# Supplementary figures and images for: Phragmites australis (Cav.) Trin. ex Steud. Extract Induces Apoptosis-like Programmed Cell Death in Acanthamoeba castellanii Trophozoites
Source: MDPI journal article supplement (doi:10.3390/plants11243459), 2022-12-09

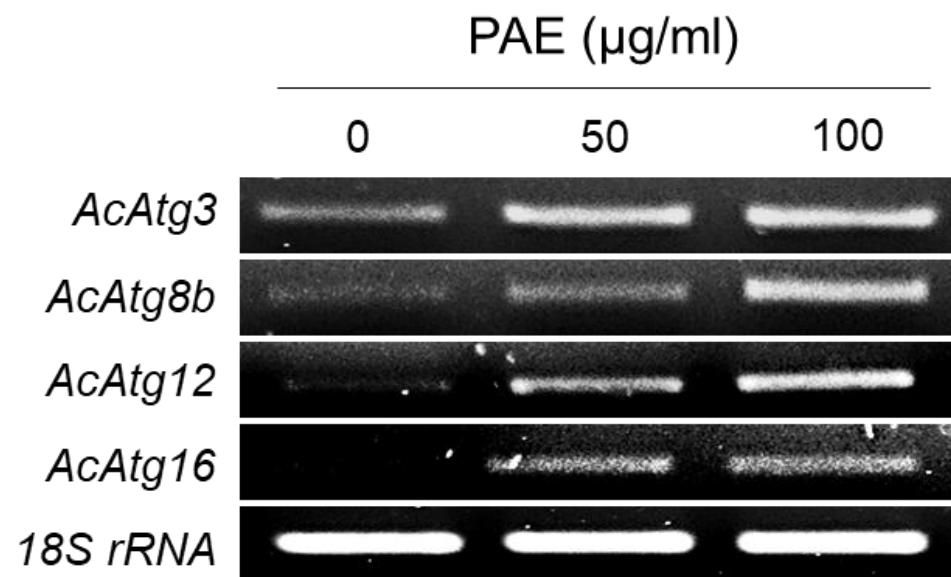

Supplement: s1 [file s1]
